# Supplementary material
Source: PubMed Central journal article supplement (PMC7673644)
Supplement: NIHMS1620540-supplement-1620540_Supp_Material.pdf [file NIHMS1620540-supplement-1620540_Supp_Material.pdf]

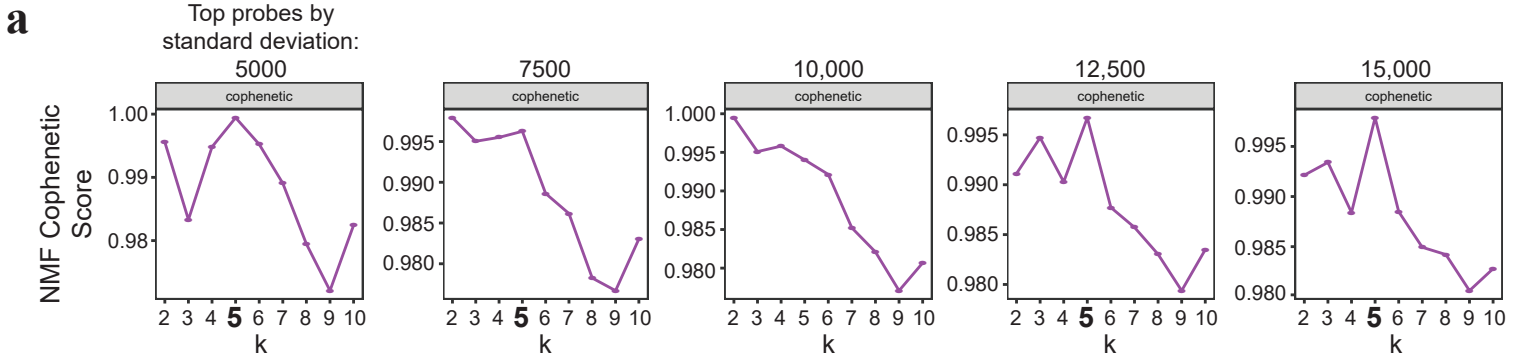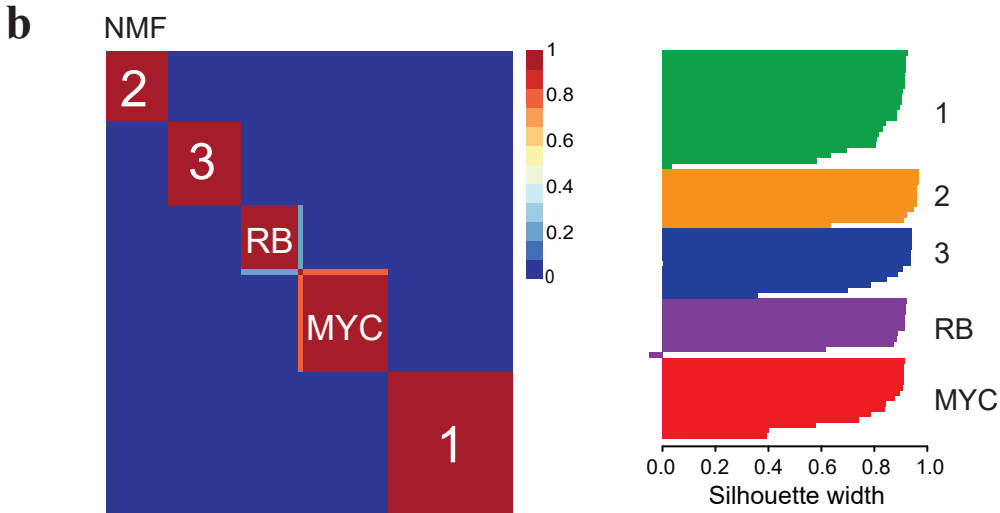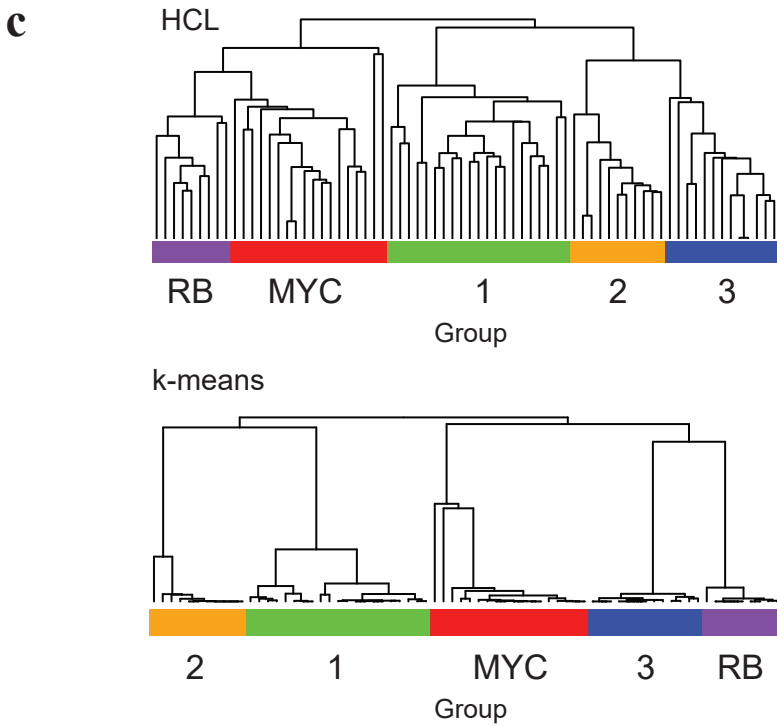

**a** RBTC814 - group 2 tumor

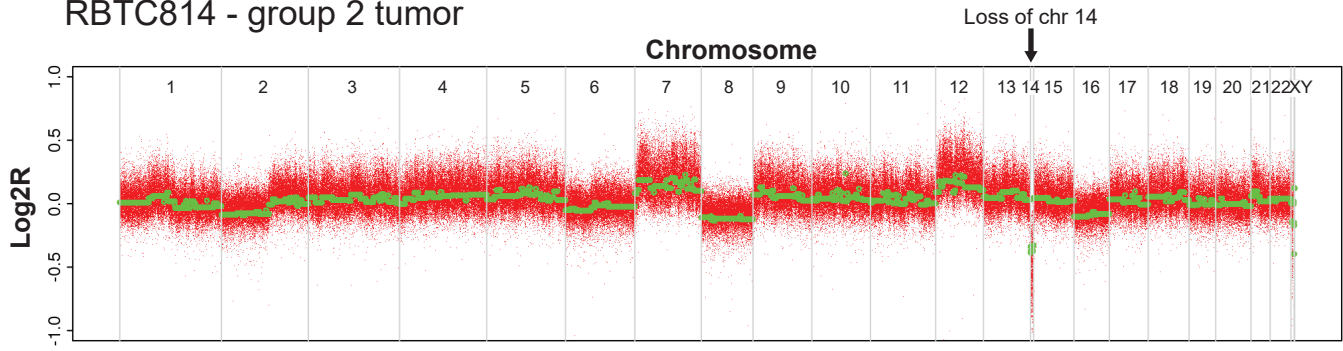

**b** RBTC746 - group RB tumor

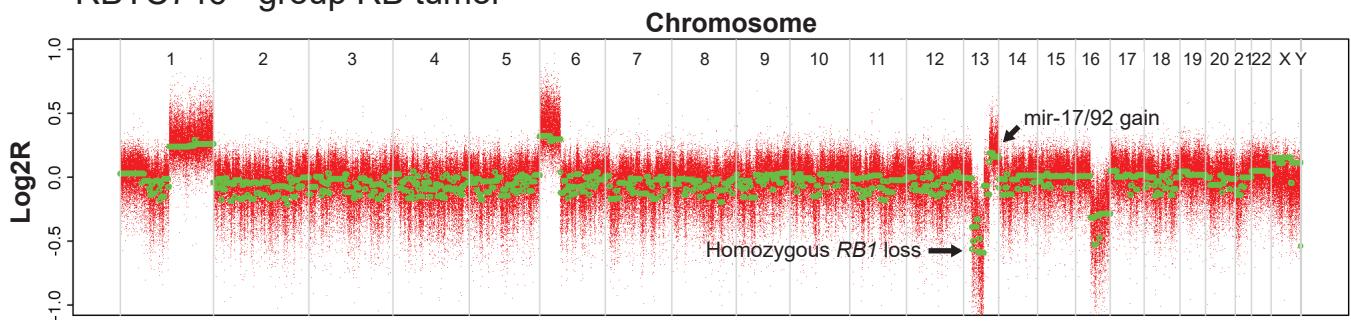

**a**

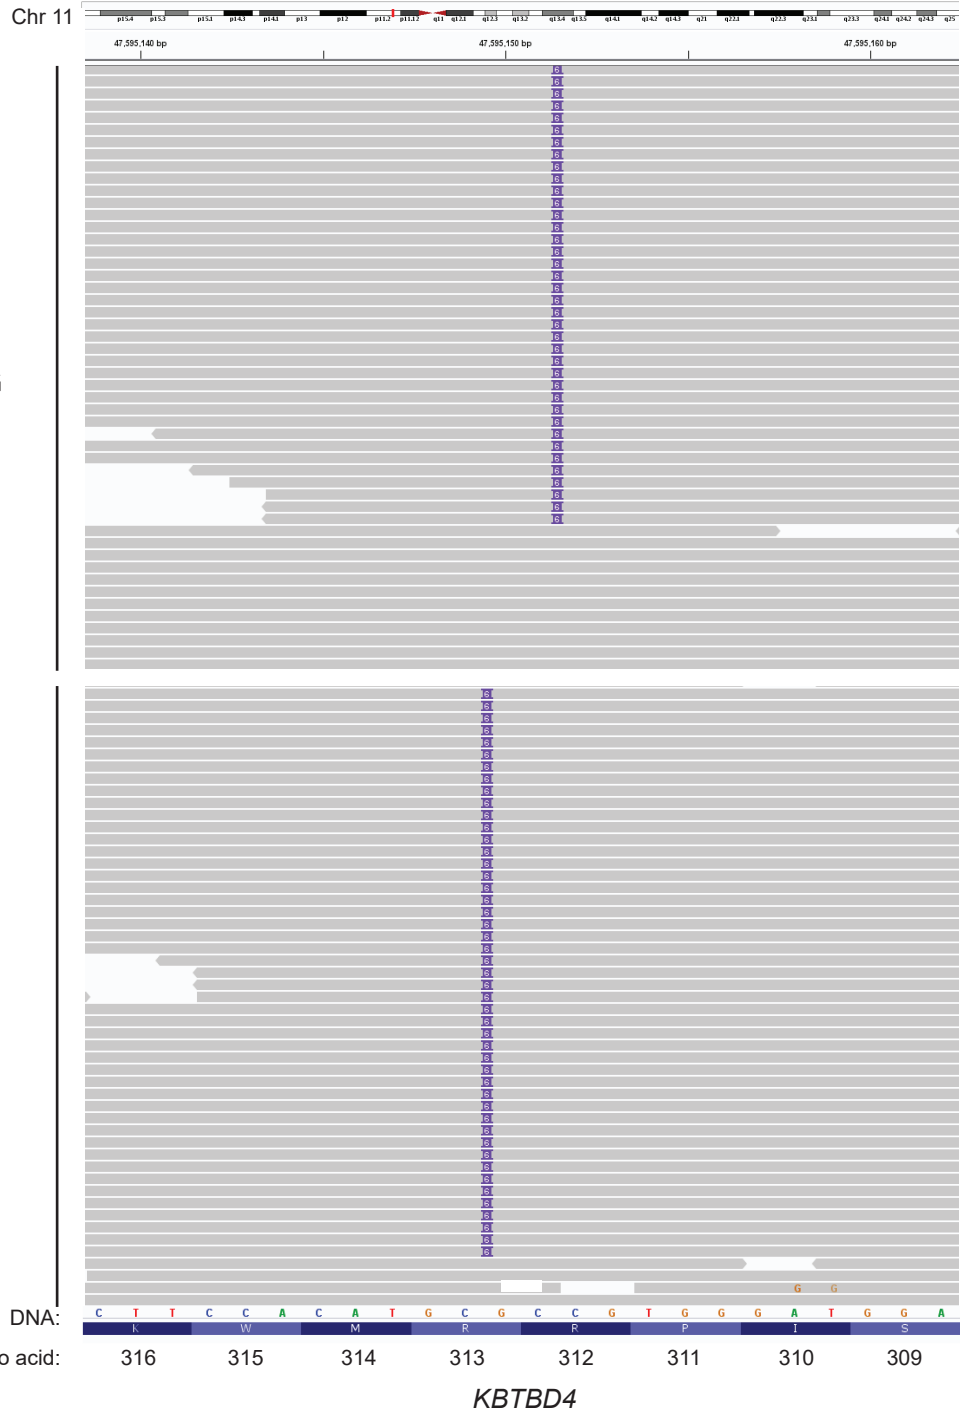

**b**

| Amino acid #                     | 316      |          |          | 315      |          |          | 314      |          |          | 313      |          |          | 312      |          |          | 311      |          |          |
|----------------------------------|----------|----------|----------|----------|----------|----------|----------|----------|----------|----------|----------|----------|----------|----------|----------|----------|----------|----------|
| Amino acid                       | K        |          |          | W        |          |          | M        |          |          | R        |          |          | R        |          |          | P        |          |          |
| DNA base #                       | 947      | 946      | 945      | 944      | 943      | 942      | 941      | 940      | 939      | 938      | 937      | 936      | 935      | 934      | 933      | 932      | 931      | 930      |
| Position in chr 11               | 47595139 | 47595140 | 47595141 | 47595142 | 47595143 | 47595144 | 47595145 | 47595146 | 47595147 | 47595148 | 47595149 | 47595150 | 47595151 | 47595152 | 47595153 | 47595154 | 47595155 | 47595156 |
| Reference DNA sequence           | C        | T        | T        | C        | C        | A        | C        | A        | T        | G        | C        | G        | C        | C        | G        | T        | G        | G        |
| RBTC786                          | C        | A        | T        | G        | C        | G        | C        | C        | G        | T        | G        | G        | G        | C        | G        | T        | G        | G        |
| Complementary                    | G        | T        | A        | C        | G        | C        | G        | G        | C        | A        | C        | C        | C        | G        | C        | A        | C        | C        |
| RBTC793                          | C        | A        | T        | G        | C        | G        | C        | C        | G        | T        | G        | G        | C        | C        | G        | T        | G        | G        |
| Complementary                    | G        | T        | A        | C        | G        | C        | G        | G        | C        | A        | C        | C        | C        | G        | C        | A        | C        | C        |
| Lee et al. "c.937_938 insGCCGTG" | C        | A        | T        | G        | C        | G        | C        | C        | G        | T        | G        | G        | C        | C        | G        | T        | G        | G        |
|                                  | G        | T        | A        | C        | G        | C        | G        | G        | C        | A        | C        | C        | C        | G        | C        | A        | C        | C        |

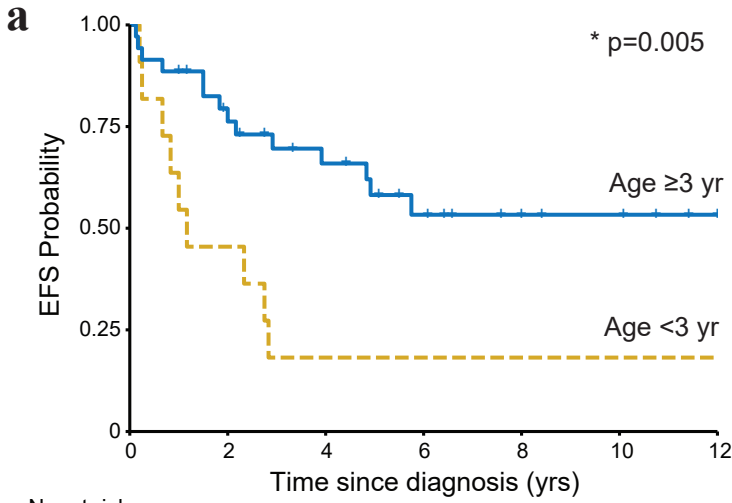

No. at risk

|         |    |    |    |    |   |   |   |
|---------|----|----|----|----|---|---|---|
| Age ≥3y | 35 | 25 | 18 | 11 | 7 | 5 | 2 |
| Age <3y | 11 | 5  | 2  | 2  | 2 | 2 | 2 |

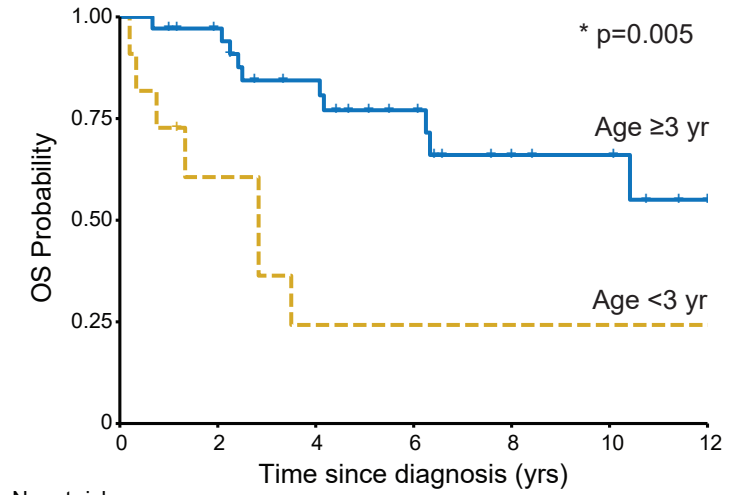

No. at risk

|         |    |    |    |    |   |   |   |
|---------|----|----|----|----|---|---|---|
| Age ≥3y | 35 | 31 | 23 | 15 | 9 | 7 | 3 |
| Age <3y | 11 | 5  | 2  | 2  | 2 | 2 | 2 |

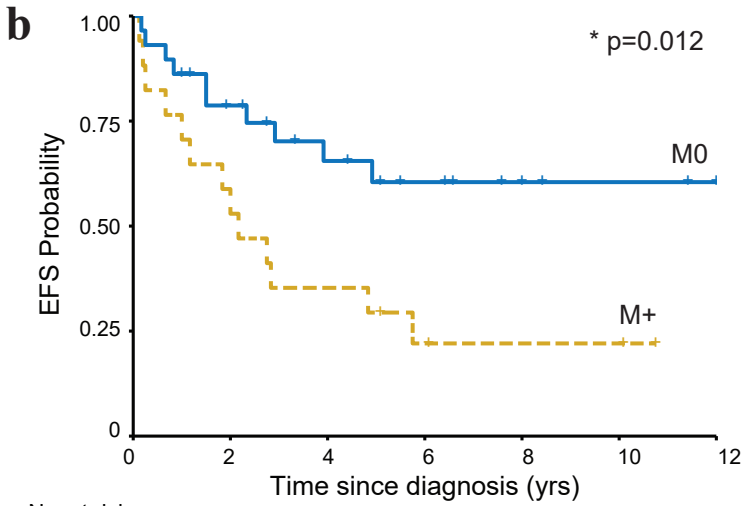

No. at risk

|    |    |    |    |    |   |   |   |
|----|----|----|----|----|---|---|---|
| M0 | 29 | 20 | 14 | 10 | 7 | 5 | 4 |
| M+ | 17 | 10 | 6  | 3  | 2 | 2 | 0 |

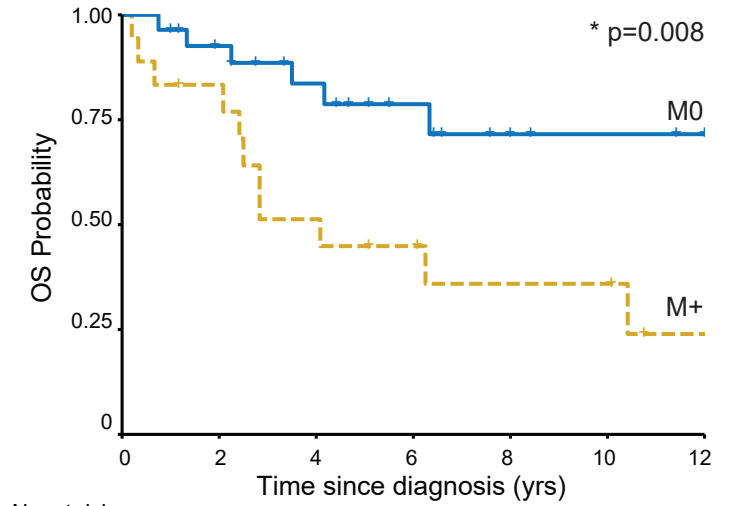

No. at risk

|    |    |    |    |    |   |   |   |
|----|----|----|----|----|---|---|---|
| M0 | 28 | 23 | 17 | 11 | 7 | 5 | 4 |
| M+ | 18 | 13 | 8  | 6  | 4 | 4 | 1 |

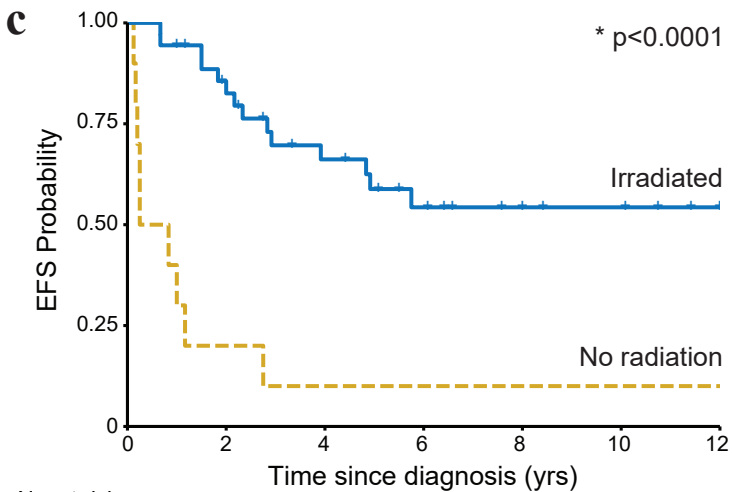

No. at risk

|              |    |    |    |    |   |   |   |
|--------------|----|----|----|----|---|---|---|
| Radiation    | 36 | 28 | 19 | 12 | 8 | 6 | 3 |
| No radiation | 10 | 2  | 1  | 1  | 1 | 1 | 1 |

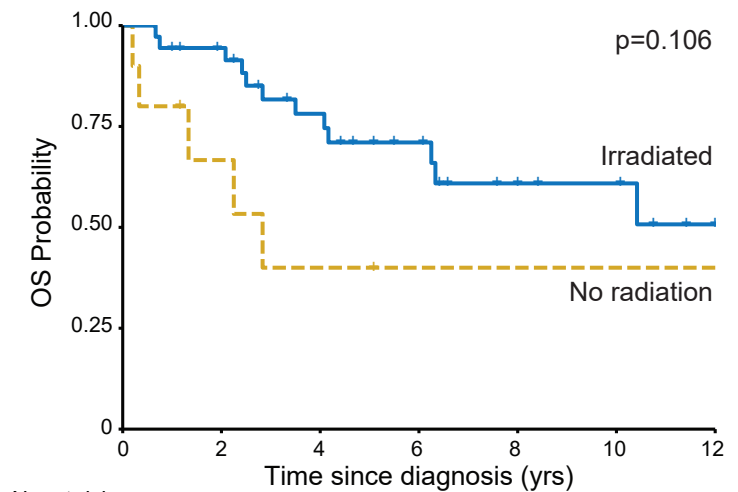

No. at risk

|              |    |    |    |    |   |   |   |
|--------------|----|----|----|----|---|---|---|
| Radiation    | 36 | 31 | 22 | 15 | 9 | 7 | 3 |
| No radiation | 10 | 5  | 3  | 2  | 2 | 2 | 2 |

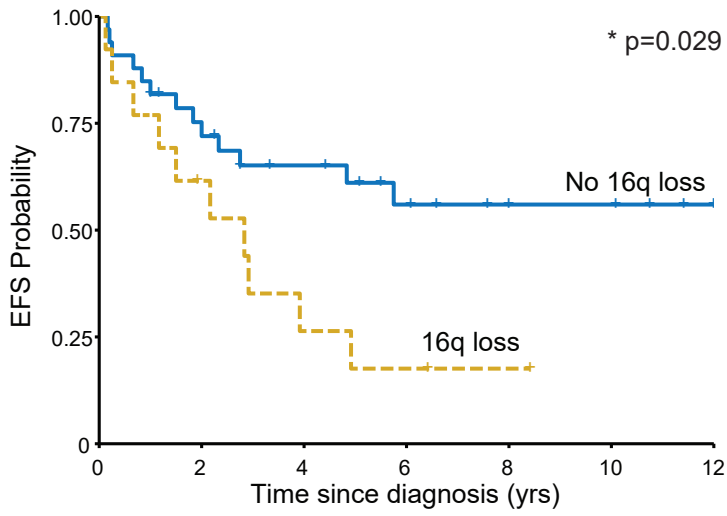

| No. at risk  |    | 0  | 2  | 4  | 6 | 8 | 10 | 12 |
|--------------|----|----|----|----|---|---|----|----|
| No loss      | 33 | 23 | 17 | 11 | 8 | 7 | 4  |    |
| Chr 16q loss | 13 | 7  | 3  | 2  | 1 | 0 | 0  |    |

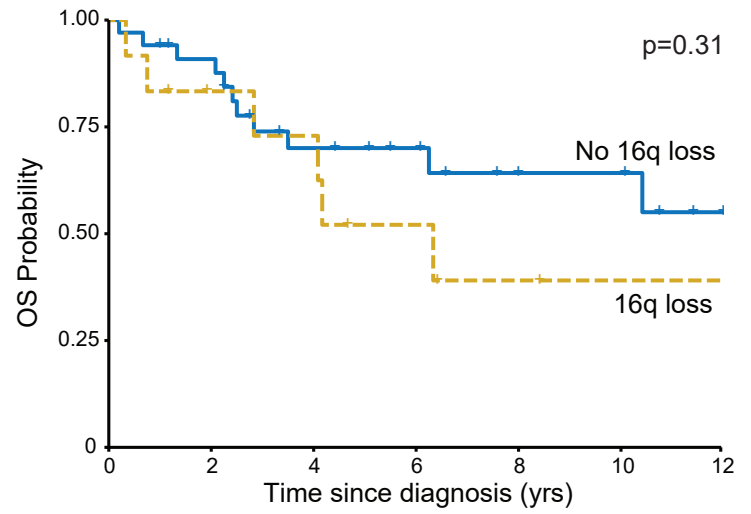

| No. at risk  |    | 0  | 2  | 4  | 6 | 8 | 10 | 12 |
|--------------|----|----|----|----|---|---|----|----|
| No loss      | 34 | 28 | 18 | 13 | 9 | 8 | 4  |    |
| Chr 16q loss | 12 | 8  | 7  | 4  | 2 | 1 | 1  |    |

Supplementary Table 1 (online resource): Samples and Analyses Performed

| RBTC ID | Insitutional Dx | Methylation based Dx | Tumour       |     | Germline     | Tumor SNP | Nano-string miRNA |
|---------|-----------------|----------------------|--------------|-----|--------------|-----------|-------------------|
|         |                 |                      | Targeted seq | WES | Targeted seq |           |                   |
| 746     | PB              | PB                   | Yes          | -   | Yes          | Yes       | -                 |
| 748     | PB              | PB                   | Yes          | -   | Yes          | Yes       | Yes               |
| 718     | PB              | PB                   | Yes          | -   | Yes          | -         | -                 |
| 723     | PB              | PB                   | Yes          | -   | Yes          | -         | -                 |
| 803     | PB              | PB                   | Yes          | -   | Yes          | -         | -                 |
| 1216    | sPNET           | PB                   | Yes          | -   | Yes          | -         | -                 |
| 1525    | PB              | PB                   | Yes          | -   | Yes          | -         | -                 |
| 1527    | PB              | PB                   | Yes          | -   | Yes          | -         | -                 |
| 1543    | PB              | PB                   | Yes          | -   | Yes          | -         | -                 |
| 1546    | PB              | PB                   | Yes          | -   | Yes          | -         | -                 |
| 1503    | PB              | PB                   | Yes          | -   | Yes          | -         | -                 |
| 1518    | PB              | PB                   | Yes          | -   | Yes          | -         | -                 |
| 1520    | PB              | PB                   | Yes          | -   | Yes          | -         | -                 |
| 1522    | PB              | PB                   | Yes          | -   | Yes          | -         | -                 |
| 715     | PB              | PB                   | Yes          | -   | Yes          | -         | -                 |
| 716     | PB              | PB                   | Yes          | -   | Yes          | -         | -                 |
| 717     | PB              | PB                   | Yes          | -   | Yes          | -         | -                 |
| 758     | PB              | PB                   | Yes          | -   | Yes          | -         | -                 |
| 745     | PB              | PB                   | Yes          | -   | Yes          | -         | -                 |
| 814     | sPNET           | PB                   | Yes          | -   | -            | Yes       | -                 |
| 742     | PB              | PB                   | Yes          | -   | -            | Yes       | -                 |
| 750     | PB              | PB                   | Yes          | -   | -            | Yes       | -                 |
| 734     | PB              | PB                   | Yes          | -   | -            | -         | -                 |
| 736     | PB              | PB                   | Yes          | -   | -            | -         | -                 |
| 738     | PB              | PB                   | Yes          | -   | -            | -         | -                 |
| 771     | PB              | PB                   | Yes          | -   | -            | -         | -                 |
| 773     | PB              | PB                   | Yes          | -   | -            | -         | -                 |
| 775     | PB              | PB                   | Yes          | -   | -            | -         | -                 |
| 776     | PB              | PB                   | Yes          | -   | -            | -         | -                 |
| 777     | PB              | PB                   | Yes          | -   | -            | -         | Yes               |
| 778     | PB              | PB                   | Yes          | -   | -            | -         | -                 |
| 780     | PB              | PB                   | Yes          | -   | -            | -         | -                 |
| 787     | PB              | PB                   | Yes          | -   | -            | -         | -                 |
| 794     | PB              | PB                   | Yes          | -   | -            | -         | -                 |
| 795     | PB              | PB                   | Yes          | -   | -            | -         | -                 |
| 801     | PB              | PB                   | Yes          | -   | -            | -         | -                 |
| 1367    | PB              | PB                   | Yes          | -   | -            | -         | -                 |

Supplementary Table 1 (online resource): Samples and Analyses Performed (continued)

| RBTC ID | Institutional Dx          | Methylation based Dx | Tumour       |     | Germline     | Tumor SNP | Nano-string miRNA |
|---------|---------------------------|----------------------|--------------|-----|--------------|-----------|-------------------|
|         |                           |                      | Targeted seq | WES | Targeted seq |           |                   |
| 1360    | sPNET                     | PB                   | Yes          | -   | -            | -         | -                 |
| 712     | sPNET                     | PB                   | Yes          | -   | -            | -         | -                 |
| 724     | PB                        | PB                   | Yes          | -   | -            | -         | -                 |
| 767     | PB                        | PB                   | Yes          | -   | -            | -         | -                 |
| 779     | PB                        | PB                   | Yes          | -   | -            | -         | -                 |
| 781     | PB                        | PB                   | Yes          | -   | -            | -         | -                 |
| 782     | PB                        | PB                   | Yes          | -   | -            | -         | -                 |
| 785     | PB                        | PB                   | Yes          | -   | -            | -         | -                 |
| 797     | PB                        | PB                   | Yes          | -   | -            | -         | -                 |
| 877     | PB                        | PB                   | Yes          | -   | -            | -         | Yes               |
| 881     | sPNET                     | PB                   | Yes          | -   | -            | -         | -                 |
| 1086    | sPNET                     | PB                   | Yes          | -   | -            | -         | -                 |
| 1231    | Trilateral retinoblastoma | PB                   | Yes          | -   | -            | -         | -                 |
| 1221    | PPTID                     | PB                   | -            | Yes | Yes          | -         | -                 |
| 799     | PB                        | PB                   | -            | Yes | Yes          | -         | -                 |
| 784     | PB                        | PB                   | -            | Yes | -            | -         | Yes               |
| 788     | PB                        | PB                   | -            | Yes | -            | -         | -                 |
| 1110    | PB                        | PB                   | -            | Yes | -            | -         | -                 |
| 1222    | PB                        | PB                   | -            | Yes | Yes          | -         | -                 |
| 786     | PB                        | PB                   | -            | Yes | -            | -         | -                 |
| 793     | PB                        | PB                   | -            | Yes | -            | -         | -                 |
| 765     | PPTID                     | PB                   | -            | Yes | -            | -         | -                 |
| 789     | PB                        | PB                   | -            | Yes | -            | -         | -                 |
| 792     | PB                        | PB                   | -            | Yes | -            | -         | -                 |
| 1533    | PB                        | PB                   | -            | -   | Yes          | -         | -                 |
| 751     | PB                        | PB                   | -            | -   | -            | Yes       | -                 |
| 1781    | sPNET                     | PB                   | -            | -   | -            | -         | Yes               |
| 757     | PB                        | PB                   | -            | -   | -            | -         | -                 |
| 761     | PB                        | PB                   | -            | -   | -            | -         | -                 |
| 763     | PB                        | PB                   | -            | -   | -            | -         | -                 |
| 764     | PB                        | PB                   | -            | -   | -            | -         | Yes               |
| 769     | PB                        | PB                   | -            | -   | -            | -         | -                 |
| 783     | PB                        | PB                   | -            | -   | -            | -         | -                 |
| 1016    | sPNET                     | PB                   | -            | -   | -            | -         | -                 |
| 1088    | PB                        | PB                   | -            | -   | -            | -         | -                 |

**Supplementary Table 2 (online resource): Ki67/MIB-1 scores and presence of hotspot *KBTD4* mutation among PB and PPTID**

| Sample   | Institutional Diagnosis | Group | Reported Ki67/MIB-1 (%)  | Hotspot <i>KBTD4</i> mutation? |
|----------|-------------------------|-------|--------------------------|--------------------------------|
| RBTC716  | PB                      | 1     | "Very high"              | n/a                            |
| RBTC717  | PB                      | 1     | >20                      | n/a                            |
| RBTC718  | PB                      | 1     | >50                      | n/a                            |
| RBTC745  | PB                      | 1     | >75                      | n/a                            |
| RBTC771  | PB                      | 1     | 51.5                     | n/a                            |
| RBTC776  | PB                      | 1     | >50                      | n/a                            |
| RBTC777  | PB                      | 1     | 40-60                    | n/a                            |
| RBTC787  | PB                      | 1     | 30-40                    | n/a                            |
| RBTC775  | PB                      | 1     | 40-80                    | n/a                            |
| RBTC773  | PB                      | 1     | 30-50                    | n/a                            |
| RBTC715  | PB                      | 2     | Mixed low and high areas | n/a                            |
| RBTC723  | PB                      | 2     | "Very high"              | n/a                            |
| RBTC803  | PB                      | 2     | 10-15                    | n/a                            |
| RBTC1222 | PB                      | 2     | 30-40                    | Absent                         |
| RBTC780  | PB                      | 2     | 25                       | n/a                            |
| RBTC781  | PB                      | 2     | 25                       | n/a                            |
| RBTC782  | PB                      | 2     | >40                      | n/a                            |
| RBTC792  | PB                      | 2     | 50                       | Absent                         |
| RBTC797  | PB                      | 2     | 15                       | n/a                            |
| RBTC742  | PB                      | 3     | n/a                      | n/a                            |
| RBTC765  | PPTID                   | 3     | 3                        | Absent                         |
| RBTC783  | PB                      | 3     | 40                       | n/a                            |
| RBTC784  | PB                      | 3     | 10                       | Absent                         |
| RBTC785  | PB                      | 3     | n/a                      | n/a                            |
| RBTC786  | PB                      | 3     | 10                       | Present                        |
| RBTC788  | PB                      | 3     | 25                       | Absent                         |
| RBTC793  | PB                      | 3     | 15                       | Present                        |
| RBTC799  | PB                      | 3     | 15                       | Absent                         |
| RBTC877  | PB                      | 3     | n/a                      | n/a                            |
| RBTC1110 | PB                      | 3     | n/a                      | Absent                         |
| RBTC1221 | PPTID                   | 3     | 15                       | Absent                         |
| RBTC1781 | sPNET                   | 3     | n/a                      | n/a                            |
| RBTC779  | PB                      | MYC   | 40                       | n/a                            |
| RBTC758  | PB                      | RB    | n/a                      | n/a                            |

Ki67/MIB-1 proliferation indices/scores were retrieved from pathology reports from original instituti  
For scores given in ranges, the mean value was used for any subsequent analyses.



Supplementary Table 3 (online resource): Details of clinical and treatment features

| RBTC ID | Histologic diagnosis | Molecular diagnosis | Molecular sub group | Primary location | M stage | Age (yrs) | Gender | PF time (mths) | Relapse | Survival time (mths) | Status | Extent of surgery | Upfront RT        | Chemo    | Intent to treat |
|---------|----------------------|---------------------|---------------------|------------------|---------|-----------|--------|----------------|---------|----------------------|--------|-------------------|-------------------|----------|-----------------|
| 712     | PNET                 | PB                  | 1                   | Temporal         | 0       | 2.0       | M      | 244            | N       | 244                  | Alive  | STR               | CSI               | HD       | Y               |
| 716     | PB                   | PB                  | 1                   | Pineal           | 3       | 6.7       | F      | 8              | N       | 8                    | Dead   | Biopsy            | CSI               | HD       | Y               |
| 717     | PB                   | PB                  | 1                   | Pineal           | 0       | 3.0       | M      | 96             | N       | 96                   | Alive  | STR               | CSI               | HD       | Y               |
| 718     | PB                   | PB                  | 1                   | Pineal           | 0       | 3.3       | M      | 144            | N       | 144                  | Alive  | STR               | CSI               | HD       | Y               |
| 745     | PB                   | PB                  | 1                   | Pineal           | 0       | 3.3       | F      | 59             | Y       | 76                   | Dead   | STR               | CSI               | HD       | Y               |
| 751     | PB                   | PB                  | 1                   | Pineal           | 0       | 11.7      | F      | n/a            | N       | 12                   | Alive  | Y;<br>unspecified | CSI               | Standard | Y               |
| 757     | PB                   | PB                  | 1                   | Pineal           | 3       | 6.7       | F      | 69             | Y       | 125                  | Dead   | STR               | CSI               | HD       | Y               |
| 763     | PB                   | PB                  | 1                   | Pineal           | 0       | 2.0       | F      | 10             | Y       | 16                   | Dead   | GTR               | No                | HD       | Y               |
| 767     | PB                   | PB                  | 1                   | Pineal           | 0       | 5.2       | M      | 101            | N       | 101                  | Alive  | GTR               | CSI               | HD       | Y               |
| 771     | PB                   | PB                  | 1                   | Pineal           | 3       | 4.2       | F      | 26             | Y       | 49                   | Dead   | STR               | CSI               | Standard | Y               |
| 773     | PB                   | PB                  | 1                   | Pineal           | 0       | 19.0      | F      | 35             | Y       | 56                   | Alive  | GTR               | CSI               | HD       | Y               |
| 775     | PB                   | PB                  | 1                   | Pineal           | 3       | 13.3      | M      | 61             | N       | 61                   | Alive  | Biopsy            | CSI               | HD       | Y               |
| 776     | PB                   | PB                  | 1                   | Pineal           | 0       | 8.7       | F      | 3              | Y       | 27                   | Dead   | STR               | No                | HD       | Y               |
| 777     | PB                   | PB                  | 1                   | Pineal           | 3       | 4.8       | M      | 58             | Y       | 75                   | Dead   | STR               | Focal             | Standard | Y               |
| 787     | PB                   | PB                  | 1                   | Pineal           | 0       | 3.0       | M      | 18             | Y       | 33                   | Alive  | STR               | Focal             | HD       | Y               |
| 789     | PB                   | PB                  | 1                   | Pineal           | 0       | 9.5       | M      | 18             | Y       | 50                   | Dead   | STR               | CSI               | Standard | Y               |
| 794     | PB                   | PB                  | 1                   | Pineal           | 3       | 41.5      | F      | 24             | Y       | 25                   | Dead   | GTR               | CSI               | Standard | Y               |
| 801     | PB                   | PB                  | 1                   | Pineal           | 3       | 6.8       | F      | 73             | N       | 73                   | Alive  | STR               | CSI               | HD       | Y               |
| 1088    | PB                   | PB                  | 1                   | Pineal           | 0       | 3.5       | M      | 53             | N       | 53                   | Alive  | Biopsy            | CSI               | HD       | Y               |
| 1216    | sPNET                | PB                  | 1                   | Pineal           | 3       | 2.0       | M      | 12             | Y       | 14                   | Alive  | GTR               | No                | HD       | Y               |
| 1367    | PB                   | PB                  | 1                   | Pineal           | 0       | 5.3       | F      | 2              | Y       | 61                   | Alive  | STR               | No                | Standard | Y               |
| 715     | PB                   | PB                  | 2                   | Pineal           | 0       | 12.5      | F      | 77             | N       | 77                   | Alive  | STR               | CSI               | HD       | Y               |
| 723     | PB                   | PB                  | 2                   | Pineal           | 0       | 11.6      | F      | 61             | N       | 61                   | Alive  | GTR               | CSI               | HD       | Y               |
| 724     | PB                   | PB                  | 2                   | Pineal           | 0       | 1.3       | F      | n/a            | n/a     | n/a                  | n/a    | n/a               | n/a               | n/a      | n/a             |
| 780     | PB                   | PB                  | 2                   | Pineal           | 3       | 8.4       | M      | 121            | N       | 121                  | Alive  | STR               | CSI               | Standard | Y               |
| 781     | PB                   | PB                  | 2                   | Pineal           | 0       | 12.7      | F      | 91             | N       | 91                   | Alive  | STR               | Focal             | HD       | Y               |
| 782     | PB                   | PB                  | 2                   | Pineal           | 0       | 31.0      | F      | 79             | N       | 79                   | Alive  | Biopsy            | CSI               | Standard | Y               |
| 792     | PB                   | PB                  | 2                   | Pineal           | n/a     | 31.5      | M      | n/a            | n/a     | n/a                  | n/a    | n/a               | n/a               | No       | n/a             |
| 797     | PB                   | PB                  | 2                   | Pineal           | 0       | 13.3      | M      | 40             | N       | 40                   | Alive  | GTR               | CSI               | HD       | Y               |
| 803     | PB                   | PB                  | 2                   | Pineal           | 0       | 12.3      | F      | 23             | N       | 23                   | Alive  | GTR               | CSI               | Standard | Y               |
| 814     | PNET                 | PB                  | 2                   | n/a              | n/a     | 12.0      | M      | n/a            | n/a     | n/a                  | Dead   | n/a               | n/a               | n/a      | N               |
| 1222    | PB                   | PB                  | 2                   | Pineal           | n/a     | 13.9      | F      | 6              | Y       | 6                    | Alive  | GTR               | No                | No       | N               |
| 742     | PB                   | PB                  | 3                   | Pineal           | n/a     | 11.0      | M      | n/a            | n/a     | n/a                  | n/a    | n/a               | n/a               | n/a      | n/a             |
| 765     | PPTID                | PB                  | 3                   | Pineal           | n/a     | n/a       | F      | n/a            | n/a     | n/a                  | n/a    | n/a               | n/a               | n/a      | n/a             |
| 783     | PB                   | PB                  | 3                   | Pineal           | 4       | 12.6      | M      | 13             | Y       | 14                   | Dead   | Biopsy            | No                | Standard | N               |
| 784     | PB                   | PB                  | 3                   | Pineal           | n/a     | 60.0      | M      | 66             | N       | 66                   | Alive  | STR               | Focal             | Standard | Y               |
| 785     | PB                   | PB                  | 3                   | Pineal           | 0       | 4.4       | F      | 33             | N       | 33                   | Alive  | GTR               | CSI               | HD       | Y               |
| 786     | PB                   | PB                  | 3                   | Pineal           | 0       | 20.4      | F      | 167            | N       | 167                  | Alive  | GTR               | Y;<br>unspecified | No       | Y               |
